# Supplementary material
Source: publisher site journal article supplement (https://study.sagepub.com/sites/default/files/Appendix%20XII%20Thought%20Evaluation%20Sheets.pdf)
Supplement: Supplementary file 1 [file Appendix%20XII%20Thought%20Evaluation%20Sheets.pdf]

# Appendix XII

## Thought Evaluation Sheets

### Alternative Thoughts

| Date | Situation<br><i>Where were you?<br/>Who was there?<br/>What were you<br/>doing? When?</i> | Emotion(s)<br><i>What did you feel<br/>at the time? How<br/>strongly did you<br/>feel it? (0-10)</i> | Negative automatic<br>thoughts and/or<br>images (NATs)<br><i>How strongly do you<br/>believe the thought?<br/>(0-10)</i> | Alternative<br>thoughts/images<br><i>What are your new<br/>balanced thoughts<br/>and/or images? How<br/>strongly do you believe<br/>them? (0-10)</i> | Outcome<br><br><i>1. Re-rate NAT<br/>2. Re-rate<br/>emotions<br/>(0-10)</i> |
|------|-------------------------------------------------------------------------------------------|------------------------------------------------------------------------------------------------------|--------------------------------------------------------------------------------------------------------------------------|------------------------------------------------------------------------------------------------------------------------------------------------------|-----------------------------------------------------------------------------|
|      |                                                                                           |                                                                                                      |                                                                                                                          |                                                                                                                                                      |                                                                             |

**Evidence For and Against**

| Date | <b>Situation</b><br>Where were you?<br>Who was there?<br>What were you doing?<br>When? | <b>Emotion(s)</b><br>What did you feel at the time? How strongly did you feel it? (0–10) | <b>Thought(s) and/or image(s)</b><br>How strongly do you believe the thought? (0–10) | <b>Evidence for the thought</b><br>What direct evidence do you have to support it? | <b>Evidence against the thought</b><br>What direct evidence do you have against it? | <b>Alternative (balanced) thought(s)</b><br>Rate how strongly you believe this alternative (0–10) |
|------|----------------------------------------------------------------------------------------|------------------------------------------------------------------------------------------|--------------------------------------------------------------------------------------|------------------------------------------------------------------------------------|-------------------------------------------------------------------------------------|---------------------------------------------------------------------------------------------------|
|      |                                                                                        |                                                                                          |                                                                                      |                                                                                    |                                                                                     |                                                                                                   |

OCD

| Date | <b>Situation</b><br>Where were you?<br>Who was there?<br>What were you doing?<br>When? | <b>Emotion(s)</b><br>What did you feel at the time? How strongly did you feel it? (0-10) | <b>Intrusive thought(s)/ image(s)</b><br>What went through your mind? | <b>Appraisal of intrusive thought/image (NAT)</b><br>What did you think about having had the intrusive thought? How strongly did you believe it? (0-10) | <b>Alternative thoughts about intrusive thought</b><br>What are your new balanced thoughts/ images? How strongly do you believe them? (0-10)? | <b>Outcome</b><br>1. Re-rate NAT<br>2. Re-rate emotions |
|------|----------------------------------------------------------------------------------------|------------------------------------------------------------------------------------------|-----------------------------------------------------------------------|---------------------------------------------------------------------------------------------------------------------------------------------------------|-----------------------------------------------------------------------------------------------------------------------------------------------|---------------------------------------------------------|
|      |                                                                                        |                                                                                          |                                                                       |                                                                                                                                                         |                                                                                                                                               |                                                         |

### Thinking Biases

| Date | <b>Situation</b><br>Where were you?<br>Who was there?<br>What were you doing?<br>When? | <b>Emotion(s)</b><br>What did you feel at the time? How strongly did you feel it? (0–10) | <b>Negative Automatic Thoughts and/or images</b><br>How strongly do you believe the thought? (0–10) | <b>Thinking bias</b><br>Does the thought seem to fit into any of the thinking bias categories? (see thinking bias sheet) | <b>Alternativethoughts/ images</b><br>What are your new balanced thoughts and/or images? How strongly do you believe them? (0–10) | <b>Outcome</b><br>1. Re-rate NAT<br>2. Re-rate emotions |
|------|----------------------------------------------------------------------------------------|------------------------------------------------------------------------------------------|-----------------------------------------------------------------------------------------------------|--------------------------------------------------------------------------------------------------------------------------|-----------------------------------------------------------------------------------------------------------------------------------|---------------------------------------------------------|
|      |                                                                                        |                                                                                          |                                                                                                     |                                                                                                                          |                                                                                                                                   |                                                         |
